# Supplementary material for: A flux tower site attribute dataset intended for land surface modeling
Source: Copernicus journal article supplement (doi:10.5194/essd-2024-77), 2024-04-10
Supplement: Supplementary file 1 [file essd-2024-77-supplement.pdf]

# Supplementary Information

The Supplementary Information contains:

Tables S1-3

5

**Table S1:** Sources of attribute values for the selected flux tower sites.

| site   | Percent plant functional types cover      | Maximum LAI               | Soil texture           | Reference height         | Soil bulk density and organic carbon concentration | Topography                                     |
|--------|-------------------------------------------|---------------------------|------------------------|--------------------------|----------------------------------------------------|------------------------------------------------|
| AT-Neu | site picture <sup>a</sup>                 | Gilmanov et al., 2007     | Wohlfahrt et al., 2008 | Wohlfahrt et al., 2008   | -                                                  | FLUXNET BADM                                   |
| AU-Cpr | Satellite data <sup>b</sup>               | Lin et al., 2023          | Sun et al., 2017       | OzFlux                   | Sun et al., 2017                                   | OzFlux; Meyer et al., 2015                     |
| AU-DaP | Satellite data                            | Lin et al., 2023          | Hutley et al., 2011    | OzFlux                   | -                                                  | OzFlux                                         |
| AU-DaS | Satellite data                            | Lin et al., 2023          | Hutley et al., 2011    | OzFlux                   | Whitley et al., 2016                               | OzFlux                                         |
| AU-Dry | Satellite data                            | Lin et al., 2023          | Hutley et al., 2011    | OzFlux                   | Whitley et al., 2016                               | OzFlux                                         |
| AU-How | Hutley et al., 2000                       | Hutley et al., 2000       | Hutley et al., 2000    | OzFlux                   | Livesley et al., 2011                              | OzFlux                                         |
| AU-Lit | Satellite data                            | Lin et al., 2023          | Shangguan et al., 2014 | OzFlux                   | -                                                  | Ukkola et al., 2022                            |
| AU-Stp | site picture                              | Lin et al., 2023          | Whitley et al., 2016   | OzFlux                   | Whitley et al., 2016                               | OzFlux                                         |
| BE-Bra | Janssens et al., 1999                     | Carrara et al., 2004      | Neiryck et al., 2002   | Carrara et al., 2004     | -                                                  | FLUXNET BADM                                   |
| BE-Lon | Moureaux et al., 2006                     | Lin et al., 2023          | Moureaux et al., 2006  | Moureaux et al., 2006    | -                                                  | FLUXNET BADM                                   |
| BE-Vie | Aubinet et al., 2001; Laitat et al., 2000 | van Wijk and Bouten, 2000 | Shangguan et al., 2014 | Aubinet et al., 2001     | -                                                  | FLUXNET BADM                                   |
| CA-Qfo | Bergeron et al., 2007                     | Chen et al., 2006         | Matheny et al., 2014   | AmeriFlux                | -                                                  | FLUXNET BADM; Bergeron et al., 2007            |
| CA-SF1 | Satellite data                            | Amiro, 2009               | Amiro, 2009            | AmeriFlux                | -                                                  | FLUXNET BADM                                   |
| CA-SF2 | Satellite data                            | Amiro, 2009               | Amiro, 2009            | AmeriFlux                | -                                                  | FLUXNET BADM                                   |
| CA-SF3 | Satellite data                            | Amiro, 2009               | Amiro, 2009            | AmeriFlux                | -                                                  | FLUXNET BADM                                   |
| CH-Cha | Osterwalder et al., 2020                  | Lin et al., 2023          | Swiss Fluxnet          | Osterwalder et al., 2020 | Osterwalder et al., 2020                           | FLUXNET BADM; Gharun et al., 2020              |
| CH-Dav | Zweifel et al., 2010                      | Etzold et al., 2011       | Gharun et al., 2020    | Etzold et al., 2011      | -                                                  | FLUXNET BADM                                   |
| CH-Fru | Rogger et al., 2022                       | Lin et al., 2023          | Swiss Fluxnet          | Rogger et al., 2022      | Rogger et al., 2022                                | FLUXNET BADM; Gharun et al., 2020              |
| CN-Cng | site picture                              | Lin et al., 2023          | Shangguan et al., 2014 | ChinaFlux                | -                                                  | ChinaFlux                                      |
| CN-Du2 | site picture                              | Miao et al., 2009         | Miao et al., 2009      | ChinaFlux                | Miao et al., 2009; ChinaFlux                       | ChinaFlux                                      |
| CN-HaM | ChinaFlux                                 | Lin et al., 2023          | Kato et al., 2006      | ChinaFlux                | -                                                  | ChinaFlux; Kato et al., 2006                   |
| CZ-wet | Satellite data                            | Lin et al., 2023          | Káplová et al., 2011   | Dušek et al., 2009       | Káplová et al., 2011                               | FLUXNET BADM                                   |
| DE-Bay | Satellite data                            | van Wijk and Bouten, 2000 | Schmid et al., 2006    | Foken, 2017              | -                                                  | Schmid et al., 2006; van Wijk and Bouten, 2000 |
| DE-Geb | Anthoni et al., 2004b                     | Anthoni et al., 2004a     | Lehuger et al., 2010   | Anthoni et al., 2004b    | -                                                  | FLUXNET BADM                                   |

|        |                         |                          |                           |                            |                            |                                             |
|--------|-------------------------|--------------------------|---------------------------|----------------------------|----------------------------|---------------------------------------------|
| DE-Gri | Hussain, 2011           | Hussain, 2011            | Hussain, 2011             | Hussain, 2011              | Hussain, 2011              | FLUXNET BADM                                |
| DE-Hai | Knohl et al., 2003      | Knohl et al., 2003       | Knohl et al., 2003        | FLUXNET BADM <sup>c</sup>  | -                          | FLUXNET BADM                                |
| DE-Kli | Prescher et al., 2010   | Lin et al., 2023         | Prescher et al., 2010     | Prescher et al., 2010      | -                          | FLUXNET BADM                                |
| DE-Meh | Satellite data          | Lin et al., 2023         | Don et al., 2009          | Don et al., 2009           | Don et al., 2009           | European Fluxes;<br>Chen and Dirmeyer, 2016 |
| DE-Obe | Satellite data          | Lin et al., 2023         | Shangguan et al., 2014    | FLUXNET BADM               | -                          | FLUXNET BADM                                |
| DE-Seh | Schmidt et al., 2012    | Schmidt et al., 2012     | Schmidt et al., 2012      | Schmidt et al., 2012       | -                          | FLUXNET BADM                                |
| DE-SfN | Satellite data          | Lin et al., 2023         | Shangguan et al., 2014    | Hommeltenberg et al., 2014 | Hommeltenberg et al., 2014 | FLUXNET BADM                                |
| DE-Tha | Prescher et al., 2010   | Slevin et al., 2015      | Prescher et al., 2010     | Prescher et al., 2010      | -                          | FLUXNET BADM;<br>Prescher et al., 2010      |
| DE-Wet | Satellite data          | Anthoni et al., 2004a    | Shangguan et al., 2014    | Anthoni et al., 2004a      | -                          | Anthoni et al., 2004a                       |
| DK-Lva | Satellite data          | Gilmanov et al., 2007    | Gilmanov et al., 2007     | Gilmanov et al., 2007      | -                          | Soussana et al., 2007                       |
| DK-Sor | Pilegaard et al., 2003  | Pilegaard et al., 2003   | Shangguan et al., 2014    | Pilegaard et al., 2003     | -                          | FLUXNET BADM;<br>Pilegaard et al., 2003     |
| ES-LMa | El-Madany et al., 2018  | El-Madany et al., 2018   | Lopez-Sangil et al., 2011 | El-Madany et al., 2018     | Lopez-Sangil et al., 2011  | European Fluxes;<br>Oliphant and Stoy, 2018 |
| FI-Hyy | Satellite data          | Kolari et al., 2022      | Kolari et al., 2022       | Vesala et al., 2005        | -                          | FLUXNET BADM                                |
| FI-Lom | Satellite data          | Aurela et al., 2015      | Shangguan et al., 2014    | Aurela et al., 2015        | -                          | FLUXNET BADM                                |
| FI-Sod | Satellite data          | Launiainen et al., 2016  | Mäkelä et al., 2008       | Thum et al., 2007          | -                          | FLUXNET BADM                                |
| FR-Gri | Lehuger et al., 2010    | Loubet et al., 2011      | Lehuger et al., 2010      | Loubet et al., 2011        | Lehuger et al., 2010       | FLUXNET BADM                                |
| FR-Hes | Granier et al., 2000    | Granier et al., 2000     | Schmid et al., 2006       | Granier et al., 2000       | -                          | European Fluxes;<br>Granier et al., 2000    |
| FR-LBr | Satellite data          | Rivalland et al., 2005   | Rivalland et al., 2005    | Berbigier et al., 2001     | -                          | FLUXNET BADM                                |
| FR-Pue | Reichstein et al., 2002 | Reichstein et al., 2002  | Rambal et al., 2003       | Rambal et al., 2003        | -                          | FLUXNET BADM;<br>European Fluxes            |
| HU-Bug | Satellite data          | Gilmanov et al., 2007    | Nagy et al., 2005         | Gilmanov et al., 2007      | -                          | Dou and Yang, 2018                          |
| IE-Dri | Jaksic et al., 2006     | Lawton et al., 2006      | Byrne et al., 2005        | Jaksic et al., 2006        | Byrne et al., 2005         | Lawton et al., 2006                         |
| IT-Amp | Satellite data          | Gilmanov et al., 2007    | Shangguan et al., 2014    | Gilmanov et al., 2007      | -                          | Oliphant and Stoy, 2018                     |
| IT-Cpz | Reichstein et al., 2002 | Reichstein et al., 2002  | Moreno et al., 2001       | FLUXNET BADM               | Moreno et al., 2001        | FLUXNET BADM;<br>Reichstein et al., 2002    |
| IT-Isp | Satellite data          | Lin et al., 2023         | Ferréa et al., 2012       | FLUXNET BADM               | Ferréa et al., 2012        | FLUXNET BADM                                |
| IT-Lav | Marcolla et al., 2003   | Lin et al., 2023         | Shangguan et al., 2014    | Marcolla et al., 2003      | -                          | FLUXNET BADM                                |
| IT-MBo | Marcolla et al., 2011   | Gilmanov et al., 2007    | Shangguan et al., 2014    | Marcolla et al., 2011      | -                          | FLUXNET BADM                                |
| IT-Noe | Morillas et al., 2017   | Marras et al., 2011      | Morillas et al., 2017     | Marras et al., 2011        | -                          | FLUXNET BADM                                |
| IT-PT1 | Satellite data          | Migliavacca et al., 2009 | Migliavacca et al., 2009  | Migliavacca et al., 2009   | Migliavacca et al., 2009   | FLUXNET BADM                                |
| IT-Ren | Montagnani et al., 2009 | Montagnani et al., 2009  | Shangguan et al., 2014    | Montagnani et al., 2009    | -                          | FLUXNET BADM                                |
| IT-SR2 | Chiesi et al., 2005     | Chiesi et al., 2005      | Arduini et al., 2020      | FLUXNET BADM               | -                          | FLUXNET BADM                                |
| IT-SRo | Chiesi et al., 2005     | Chiesi et al., 2005      | Arduini et al., 2020      | FLUXNET BADM               | -                          | FLUXNET BADM                                |

|        |                                                 |                            |                             |                            |                     |                                             |
|--------|-------------------------------------------------|----------------------------|-----------------------------|----------------------------|---------------------|---------------------------------------------|
| NL-Ca1 | Beljaars and Bosveld, 1997                      | Jacobs et al., 2007        | Jacobs et al., 2007         | Beljaars and Bosveld, 1997 | Jacobs et al., 2007 | Oliphant and Stoy, 2018                     |
| NL-Loo | FLUXNET BADM                                    | Moors et al., 2012         | Moors et al., 2012          | Moors et al., 2012         | -                   | FLUXNET BADM                                |
| PL-wet | Satellite data                                  | Lund et al., 2009          | Shangguan et al., 2014      | Kowalska et al., 2013      | -                   | European Fluxes;<br>Oliphant and Stoy, 2018 |
| PT-Mi2 | Pereira et al., 2007                            | Pereira et al., 2007       | Shangguan et al., 2014      | Pereira et al., 2007       | -                   | Oliphant and Stoy, 2018                     |
| RU-Fyo | Milyukova et al., 2002                          | Launiainen et al., 2016    | Schulze et al., 1999        | Kurbatova et al., 2008     | -                   | FLUXNET BADM                                |
| SD-Dem | Ardö et al., 2008                               | Lin et al., 2023           | Ardö et al., 2008           | Ardö et al., 2008          | Ardö et al., 2008   | FLUXNET BADM                                |
| US-AR1 | Satellite data                                  | Lin et al., 2023           | Raz-Yaseef et al., 2015     | AmeriFlux                  | -                   | AmeriFlux BADM                              |
| US-AR2 | Satellite data                                  | Lin et al., 2023           | Raz-Yaseef et al., 2015     | AmeriFlux                  | -                   | AmeriFlux BADM                              |
| US-ARM | site picture                                    | Fischer et al., 2007       | AmeriFlux BADM <sup>d</sup> | AmeriFlux                  | AmeriFlux BADM      | AmeriFlux BADM                              |
| US-Aud | Krishnan et al., 2012                           | Krishnan et al., 2012      | Krishnan et al., 2012       | AmeriFlux                  | -                   | Krishnan et al., 2012                       |
| US-Bkg | Satellite data                                  | Hollinger et al., 2010     | Shangguan et al., 2014      | AmeriFlux                  | -                   | AmeriFlux                                   |
| US-Bo1 | Meyers and Hollinger, 2004                      | Meyers and Hollinger, 2004 | Meyers and Hollinger, 2004  | AmeriFlux                  | AmeriFlux BADM      | AmeriFlux BADM                              |
| US-FPe | site picture;<br>Gilmanov et al., 2005          | Slevin et al., 2015        | Gilmanov et al., 2005       | AmeriFlux                  | -                   | Gilmanov et al., 2005                       |
| US-GLE | Satellite data                                  | Chu et al., 2018           | Shangguan et al., 2014      | AmeriFlux                  | -                   | AmeriFlux BADM                              |
| US-Goo | Satellite data                                  | Hollinger et al., 2010     | Shangguan et al., 2014      | AmeriFlux                  | -                   | FLUXNET BADM                                |
| US-Ho1 | Hollinger et al., 1999                          | AmeriFlux BADM             | Matheny et al., 2014        | AmeriFlux                  | AmeriFlux BADM      | AmeriFlux BADM                              |
| US-KS2 | Satellite data                                  | Powell et al., 2006        | AmeriFlux BADM              | AmeriFlux                  | AmeriFlux BADM      | AmeriFlux BADM                              |
| US-Los | Satellite data                                  | Desai et al., 2008         | Shangguan et al., 2014      | AmeriFlux                  | AmeriFlux BADM      | AmeriFlux BADM                              |
| US-Me2 | Satellite data                                  | AmeriFlux BADM             | Thomas et al., 2009         | AmeriFlux                  | AmeriFlux BADM      | AmeriFlux BADM                              |
| US-Me4 | Law et al., 2001                                | Anthoni et al., 2002       | Law et al., 2001            | AmeriFlux                  | Law et al., 2001    | AmeriFlux BADM                              |
| US-Me6 | Satellite data                                  | Chu et al., 2018           | Ruehr et al., 2014          | AmeriFlux                  | AmeriFlux BADM      | AmeriFlux BADM                              |
| US-MMS | Schmid et al., 2000;<br>AmeriFlux               | Slevin et al., 2015        | AmeriFlux BADM              | AmeriFlux                  | AmeriFlux BADM      | AmeriFlux BADM                              |
| US-MOz | Satellite data                                  | AmeriFlux BADM             | Gu et al., 2006             | AmeriFlux                  | AmeriFlux BADM      | AmeriFlux BADM                              |
| US-Ne3 | site picture                                    | AmeriFlux BADM             | AmeriFlux BADM              | AmeriFlux                  | AmeriFlux BADM      | AmeriFlux BADM                              |
| US-NR1 | Monson et al., 2002                             | AmeriFlux BADM             | Burns et al., 2018          | AmeriFlux                  | AmeriFlux BADM      | AmeriFlux BADM                              |
| US-SP2 | Satellite data                                  | AmeriFlux BADM             | AmeriFlux BADM              | AmeriFlux                  | AmeriFlux BADM      | AmeriFlux BADM                              |
| US-SP3 | Satellite data                                  | AmeriFlux BADM             | AmeriFlux BADM              | AmeriFlux                  | AmeriFlux BADM      | AmeriFlux BADM                              |
| US-SRG | Scott et al., 2015;<br>AmeriFlux                | Lin et al., 2023           | Scott et al., 2015          | AmeriFlux                  | -                   | AmeriFlux BADM                              |
| US-SRM | Barron-Gafford et al., 2011; Scott et al., 2009 | Scott et al., 2009         | Scott et al., 2015          | AmeriFlux                  | AmeriFlux BADM      | AmeriFlux BADM                              |
| US-Syv | Desai et al., 2005                              | Tang et al., 2006          | AmeriFlux BADM              | AmeriFlux                  | AmeriFlux BADM      | AmeriFlux BADM                              |
| US-Ton | Baldocchi et al., 2004                          | Baldocchi et al., 2004     | Baldocchi et al., 2004      | AmeriFlux                  | AmeriFlux BADM      | AmeriFlux BADM                              |
| US-Var | Liu et al., 2017                                | AmeriFlux BADM             | Grant et al., 2012          | AmeriFlux                  | Grant et al., 2012  | AmeriFlux BADM                              |
| US-WCr | Satellite data                                  | Chu et al., 2018           | Cook et al., 2004           | AmeriFlux                  | AmeriFlux BADM      | AmeriFlux BADM                              |
| US-Whs | Scott et al., 2006                              | Lin et al., 2023           | Scott et al., 2006          | AmeriFlux                  | -                   | AmeriFlux BADM;<br>Moran et al., 2009       |

- <sup>a</sup> Site picture: Using site picture to derive 100% coverage of grassland or cropland. Except for AT-Neu and US-FPe, all site pictures were obtained from the regional network<sup>e</sup> to which the site belongs. AT-Neu pictures were obtained from the research group's network (<http://www.biomet.co.at/home/>). US-FPe pictures were obtained from the Global Monitoring Laboratory
- 10 (<https://gml.noaa.gov/grad/surfrad/ftpeck.html>).
- <sup>b</sup> Satellite data: Indicating the PCT\_PFT obtained using the 300m global PFT map (Harper et al., 2023) .
- <sup>c</sup> FLUXNET BADM: BADM (Biological, Ancillary, Disturbance, and Metadata) file from the FLUNET website (<https://fluxnet.org/>).
- <sup>d</sup> AmeriFlux BADM: BADM file from the AmeriFlux (<https://ameriflux.lbl.gov/>).
- 15 <sup>e</sup> Regional network: AmeriFlux (<https://ameriflux.lbl.gov/>), ChinaFlux (<http://www.chinaflux.org/>), European Fluxes (<http://www.europe-fluxdata.eu/>), OzFlux (<https://www.ozflux.org.au/>), and Swiss Fluxnet (<https://www.swissfluxnet.ethz.ch/>).

**Table S2:** Selected years for the 90 sites and corresponding databases. The excluded year denotes years excluded due to a high percentage of gap-filled data, with the reason (Flux or VPD) in parentheses indicating the specific variable with a high gap-filled proportion (Flux: QC > 1 exceeds 10%; VPD: QC > 0 exceeds 10%). The selected year indicates the years of high-quality datasets that were ultimately retained.

| Selected site | Excluded year (Reason)                         | Selected year                                          | Database    |
|---------------|------------------------------------------------|--------------------------------------------------------|-------------|
| AT-Neu        | 2002-2003 (VPD)                                | 2004-2012                                              | FLUXNET2015 |
| AU-Cpr        | 2013-2014 (Flux)                               | 2011-2012, 2015-2017                                   | OzFlux      |
| AU-DaP        | 2009,2011-2012 (Flux)                          | 2010                                                   | OzFlux      |
| AU-DaS        | 2010-2011, 2014-2015, 2017 (Flux)              | 2012-2013, 2016                                        | OzFlux      |
| AU-Dry        | 2011-2012, 2014-2015 (Flux)                    | 2013                                                   | OzFlux      |
| AU-How        | 2003-2015 (Flux)                               | 2016-2017                                              | OzFlux      |
| AU-Lit        | 2016 (Flux)                                    | 2017                                                   | OzFlux      |
| AU-Stp        | 2010-2014, 2016-2017 (Flux)                    | 2015                                                   | OzFlux      |
| BE-Bra        | 2004, 2013 (Flux); 2005-2006, 2010 (VPD)       | 2007-2009, 2011-2012, 2014                             | FLUXNET2015 |
| BE-Lon        | 2006-2007 (Flux); 2009-2010 (VPD)              | 2005, 2008, 2011-2014                                  | FLUXNET2015 |
| BE-Vie        | 2004, 2006, 2009, 2012-2013 (Flux); 1999 (VPD) | 1997-1998, 2000-2003, 2005, 2007-2008, 2010-2011, 2014 | FLUXNET2015 |
| CA-Qfo        | 2004, 2009, 2010 (Flux)                        | 2005-2008                                              | FLUXNET2015 |
| CA-SF1        | 2006 (Flux)                                    | 2004-2005                                              | FLUXNET2015 |
| CA-SF2        | 2005 (Flux)                                    | 2003-2004                                              | FLUXNET2015 |
| CA-SF3        | 2005 (VPD)                                     | 2003-2004                                              | FLUXNET2015 |
| CH-Cha        | 2009 (Flux); 2007, 2011-2014 (VPD)             | 2006, 2008, 2010                                       | FLUXNET2015 |
| CH-Dav        | 2005 (Flux); 1998-1999 (VPD)                   | 1997, 2000-2004, 2006-2014                             | FLUXNET2015 |
| CH-Fru        | 2009-2010 (Flux); 2011 (VPD)                   | 2007-2008, 2012-2014                                   | FLUXNET2015 |
| CN-Cng        | -                                              | 2008-2009                                              | FLUXNET2015 |
| CN-Du2        | -                                              | 2007-2008                                              | FLUXNET2015 |
| CN-HaM        | 2002 (Flux)                                    | 2003                                                   | FLUXNET2015 |
| CZ-wet        | 2013 (VPD)                                     | 2007-2012, 2014                                        | FLUXNET2015 |
| DE-Bay        | 1997 (Flux); 1999(VPD)                         | 1998                                                   | La Thuile   |
| DE-Geb        | -                                              | 2001-2014                                              | FLUXNET2015 |
| DE-Gri        | -                                              | 2004-2014                                              | FLUXNET2015 |
| DE-Hai        | 2010-2012 (Flux)                               | 2000-2009                                              | FLUXNET2015 |
| DE-Kli        | 2008-2009, 2013 (Flux)                         | 2005-2007, 2010-2012, 2014                             | FLUXNET2015 |

|        |                                                            |                                  |             |
|--------|------------------------------------------------------------|----------------------------------|-------------|
| DE-Meh | -                                                          | 2004-2006                        | La Thuile   |
| DE-Obe | 2009 (VPD)                                                 | 2008, 2010-2014                  | FLUXNET2015 |
| DE-Seh | 2010 (Flux)                                                | 2008-2009                        | FLUXNET2015 |
| DE-SfN | 2013 (Flux)                                                | 2014                             | FLUXNET2015 |
| DE-Tha | -                                                          | 1998-2014                        | FLUXNET2015 |
| DE-Wet | -                                                          | 2002-2006                        | La Thuile   |
| DK-Lva | 2005 (VPD)                                                 | 2006                             | La Thuile   |
| DK-Sor | 2004, 2014 (Flux); 1997, 2005 (VPD)                        | 1998-2003, 2006-2013             | FLUXNET2015 |
| ES-LMa | 2006 (VPD)                                                 | 2004-2005                        | La Thuile   |
| FI-Hyy | 1996, 2000, 2005 (Flux); 1998, 2003-2004, 2010-2014 (VPD)  | 1997, 1999, 2001-2002, 2006-2009 | FLUXNET2015 |
| FI-Lom | -                                                          | 2007-2009                        | FLUXNET2015 |
| FI-Sod | 2010, 2012 (Flux); 2013 (VPD)                              | 2008-2009, 2011, 2014            | FLUXNET2015 |
| FR-Gri | 2008-2009 (Flux); 2005-2006 (VPD)                          | 2007, 2010-2013                  | FLUXNET2015 |
| FR-Hes | 2000 (Flux)                                                | 1997-1999, 2001-2006             | La Thuile   |
| FR-LBr | 2008 (Flux)                                                | 2003-2007                        | FLUXNET2015 |
| FR-Pue | 2000, 2012 (Flux)                                          | 2001-2011, 2013-2014             | FLUXNET2015 |
| HU-Bug | 2003-2005 (Flux)                                           | 2006                             | La Thuile   |
| IE-Dri | 2005 (Flux)                                                | 2003-2004                        | La Thuile   |
| IT-Amp | 2005-2006 (Flux)                                           | 2003-2004                        | La Thuile   |
| IT-Cpz | 2001-2002, 2004, 2008 (Flux); 2003, 2006 (VPD)             | 2005, 2007                       | FLUXNET2015 |
| IT-Isp | -                                                          | 2013-2014                        | FLUXNET2015 |
| IT-Lav | 2012, 2014 (Flux); 2009-2010 (VPD)                         | 2005-2008, 2011, 2013            | FLUXNET2015 |
| IT-MBo | 2008-2010 (VPD)                                            | 2003-2007, 2011-2012             | FLUXNET2015 |
| IT-Noe | 2004, 2009, 2011, 2013-2014 (Flux); 2005, 2008, 2010 (VPD) | 2006-2007, 2012                  | FLUXNET2015 |
| IT-PT1 | 2004 (Flux)                                                | 2003                             | FLUXNET2015 |
| IT-Ren | -                                                          | 2010-2013                        | FLUXNET2015 |
| IT-SR2 | -                                                          | 2013-2014                        | FLUXNET2015 |
| IT-SRo | 2005, 2008-2010 (Flux); 2011 (VPD)                         | 2003-2004, 2006-2007, 2012       | FLUXNET2015 |
| NL-Ca1 | 2005 (Flux)                                                | 2003-2004, 2006                  | La Thuile   |
| NL-Loo | 1998-1999, 2008, 2013 (Flux); 2001 (VPD)                   | 1997, 2000, 2002-2007, 2009-2012 | FLUXNET2015 |
| PL-wet | 2004 (VPD)                                                 | 2005                             | La Thuile   |

|        |                                           |                                       |             |
|--------|-------------------------------------------|---------------------------------------|-------------|
| PT-Mi2 | -                                         | 2005-2006                             | La Thuile   |
| RU-Fyo | 2010 (Flux)                               | 2003-2009, 2011-2014                  | FLUXNET2015 |
| SD-Dem | 2005-2008 (Flux)                          | 2009                                  | FLUXNET2015 |
| US-AR1 | 2012 (Flux)                               | 2010-2011                             | FLUXNET2015 |
| US-AR2 | -                                         | 2010-2011                             | FLUXNET2015 |
| US-ARM | 2012 (Flux); 2008 (VPD)                   | 2003-2007, 2009-2011                  | FLUXNET2015 |
| US-Aud | 2003 (Flux)                               | 2004-2005                             | La Thuile   |
| US-Bkg | 2005 (VPD)                                | 2006                                  | La Thuile   |
| US-Bo1 | 2000-2001, 2004, 2006 (Flux)              | 1997-1999, 2002-2003, 2005            | La Thuile   |
| US-FPe | 2000-2003 (Flux)                          | 2004-2006                             | La Thuile   |
| US-GLE | -                                         | 2009-2014                             | FLUXNET2015 |
| US-Goo | 2004-2005 (Flux)                          | 2006                                  | La Thuile   |
| US-Ho1 | 1996, 1998, 2002 (VPD)                    | 1997, 1999-2001, 2003-2004            | La Thuile   |
| US-KS2 | 2003 (Flux); 2006 (VPD)                   | 2004-2005                             | FLUXNET2015 |
| US-Los | 2000 (Flux)                               | 2001-2008                             | FLUXNET2015 |
| US-Me2 | 2003, 2006, 2011, 2014 (Flux); 2007 (VPD) | 2002, 2004-2005, 2008-2010, 2012-2013 | FLUXNET2015 |
| US-Me4 | 1996-1999 (Flux)                          | 2000                                  | La Thuile   |
| US-Me6 | 2011 (Flux); 2012, 2014 (VPD)             | 2013                                  | FLUXNET2015 |
| US-MMS | 2000 (Flux); 1999 (VPD)                   | 2001-2014                             | FLUXNET2015 |
| US-MOz | -                                         | 2005-2006                             | La Thuile   |
| US-Ne3 | -                                         | 2002-2012                             | FLUXNET2015 |
| US-NR1 | -                                         | 1999-2014                             | FLUXNET2015 |
| US-SP2 | -                                         | 2000-2004                             | La Thuile   |
| US-SP3 | 1999-2000 (Flux)                          | 2001-2004                             | La Thuile   |
| US-SRG | -                                         | 2009-2014                             | FLUXNET2015 |
| US-SRM | -                                         | 2004-2014                             | FLUXNET2015 |
| US-Syv | 2004-2005, 2007-2008 (Flux)               | 2002-2003, 2006                       | FLUXNET2015 |
| US-Ton | 2001, 2007 (Flux)                         | 2002-2006, 2008-2014                  | FLUXNET2015 |
| US-Var | 2005 (Flux)                               | 2001-2004, 2006-2014                  | FLUXNET2015 |
| US-WCr | 1999, 2004, 2006 (Flux); 2001 (VPD)       | 2000, 2002-2003, 2005                 | FLUXNET2015 |
| US-Whs | -                                         | 2008-2014                             | FLUXNET2015 |
| US-Wkg | -                                         | 2005-2014                             | FLUXNET2015 |

---

25 **Table S3:** The 80 sites excluded and specific reasons for exclusion. Four situations are included: only one year of observations; high proportion of gap-filled data in flux or VPD; lack of surface heat flux observations and 10 sites with external disturbances. Flux and VPD in parentheses are the same as in Table S2.

| <b>Excluded Site</b> | <b>Reason for excluding</b>   | <b>Database</b> |
|----------------------|-------------------------------|-----------------|
| AR-SLu               | Only one year of observations | FLUXNET2015     |
| BW-Ma1               | Only one year of observations | La Thuile       |
| CA-NS1               | Only one year of observations | FLUXNET2015     |
| DK-Fou               | Only one year of observations | FLUXNET2015     |
| ES-LgS               | Only one year of observations | FLUXNET2015     |
| ES-VDA               | Only one year of observations | La Thuile       |
| IT-Ma1               | Only one year of observations | La Thuile       |
| IT-Non               | Only one year of observations | La Thuile       |
| PT-Mi1               | Only one year of observations | La Thuile       |
| RU-Zot               | Only one year of observations | La Thuile       |
| UK-Ham               | Only one year of observations | La Thuile       |
| US-Bar               | Only one year of observations | La Thuile       |
| US-SP1               | Only one year of observations | La Thuile       |
| US-Tw4               | Only one year of observations | FLUXNET2015     |
| ZM-Mon               | Only one year of observations | FLUXNET2015     |
| AU-ASM               | 2011-2017 (Flux)              | OzFlux          |
| AU-Cow               | 2010-2015 (Flux)              | OzFlux          |
| AU-Ctr               | 2010-2017 (Flux)              | OzFlux          |
| AU-Cum               | 2013-2018 (Flux)              | OzFlux          |
| AU-Emr               | 2012-2013 (Flux)              | OzFlux          |
| AU-Gin               | 2012-2017 (Flux)              | OzFlux          |
| AU-GWW               | 2013-2017 (Flux)              | OzFlux          |
| AU-Otw               | 2009-2010 (Flux)              | OzFlux          |
| AU-Rig               | 2011-2016 (Flux)              | OzFlux          |
| AU-Rob               | 2014-2017 (Flux)              | OzFlux          |
| AU-Sam               | 2011-2017 (Flux)              | OzFlux          |
| AU-TTE               | 2013-2017 (Flux)              | OzFlux          |
| AU-Tum               | 2002-2017 (Flux)              | OzFlux          |
| AU-Whr               | 2015-2016 (Flux)              | OzFlux          |



|        |                              |             |
|--------|------------------------------|-------------|
| AU-Wrr | 2016-2017 (Flux)             | OzFlux      |
| AU-Ync | 2011-2017 (Flux)             | OzFlux      |
| BR-Sa3 | 2001-2003 (VPD)              | FLUXNET2015 |
| DK-ZaH | 2000-2013 (Flux)             | FLUXNET2015 |
| FI-Kaa | 2000-2002 (VPD)              | La Thuile   |
| IT-CA2 | 2012-2013 (VPD)              | FLUXNET2015 |
| IT-Col | 2007-2014 (Flux)             | FLUXNET2015 |
| IT-LMa | 2003-2004 (Flux)             | La Thuile   |
| NL-Hor | 2009-2011 (Flux); 2008 (VPD) | FLUXNET2015 |
| PT-Esp | 2002-2004 (Flux)             | La Thuile   |
| RU-Che | 2003-2004 (Flux)             | FLUXNET2015 |
| UK-Gri | 2001 (Flux); 2000 (VPD)      | La Thuile   |
| US-Blo | 2000-2006 (VPD)              | FLUXNET2015 |
| US-Cop | 2002-2003 (Flux)             | FLUXNET2015 |
| US-Prr | 2011-2013 (Flux)             | FLUXNET2015 |
| ZA-Kru | 2000-2002 (Flux)             | FLUXNET2015 |
| CA-NS2 | No observation of Qg         | FLUXNET2015 |
| CA-NS4 | No observation of Qg         | FLUXNET2015 |
| CA-NS5 | No observation of Qg         | FLUXNET2015 |
| CA-NS6 | No observation of Qg         | FLUXNET2015 |
| CA-NS7 | No observation of Qg         | FLUXNET2015 |
| CH-Oe1 | No observation of Qg         | FLUXNET2015 |
| CN-Cha | No observation of Qg         | FLUXNET2015 |
| CN-Dan | No observation of Qg         | FLUXNET2015 |
| CN-Din | No observation of Qg         | FLUXNET2015 |
| CN-Qia | No observation of Qg         | FLUXNET2015 |
| DK-Ris | No observation of Qg         | La Thuile   |
| DK-ZaH | No observation of Qg         | FLUXNET2015 |
| FR-Fon | No observation of Qg         | FLUXNET2015 |
| GF-Guy | No observation of Qg         | FLUXNET2015 |
| ID-Pag | No observation of Qg         | La Thuile   |
| IT-Ro1 | No observation of Qg         | FLUXNET2015 |
| PT-Esp | No observation of Qg         | La Thuile   |

|        |                                                                     |             |
|--------|---------------------------------------------------------------------|-------------|
| SE-Deg | No observation of Qg                                                | La Thuile   |
| UK-PL3 | No observation of Qg                                                | La Thuile   |
| US-Ha1 | No observation of Qg                                                | FLUXNET2015 |
| US-Myb | No observation of Qg                                                | FLUXNET2015 |
| US-PFa | No observation of Qg                                                | FLUXNET2015 |
| US-UMB | No observation of Qg                                                | FLUXNET2015 |
| FR-Fq1 | Energy Balance Ratio = $(LH+H)/(Rn - G) = 35.4\%$                   | La Thuile   |
| FR-Fq2 | Energy Balance Ratio = $(LH+H)/(Rn - G) = 34.3\%$                   | La Thuile   |
| CA-Qcu | Logging was carried out in 2000 (Giasson et al., 2006).             | La Thuile   |
| ES-ES1 | Affected by large water bodies (Haughton et al., 2016).             | La Thuile   |
| ES-ES2 | Farmland with irrigation (Haughton et al., 2016).                   | La Thuile   |
| IT-BCi | Farmland with irrigation (Vitale et al., 2016).                     | FLUXNET2015 |
| IT-CA1 | Irrigation during the summer (Sabbatini et al., 2016).              | FLUXNET2015 |
| IT-CA3 | Irrigation during the summer (Sabbatini et al., 2016).              | FLUXNET2015 |
| IT-Ro2 | Deforestation (Rey et al., 2002; Tedeschi et al., 2006).            | FLUXNET2015 |
| US-Ne1 | Farmland with irrigation (Verma et al., 2005).                      | FLUXNET2015 |
| US-Ne2 | Farmland with irrigation (Verma et al., 2005).                      | FLUXNET2015 |
| US-Twt | Rice planting is flooded most of the time (Baldocchi et al., 2016). | FLUXNET2015 |

---

## References

- 30 Amiro, B.: Measuring boreal forest evapotranspiration using the energy balance residual, *Journal of Hydrology*, 366, 112–118, <https://doi.org/10.1016/j.jhydrol.2008.12.021>, 2009.
- Anthoni, P. M., Unsworth, M. H., Law, B. E., Irvine, J., Baldocchi, D. D., Tuyl, S. V., and Moore, D.: Seasonal differences in carbon and water vapor exchange in young and old-growth ponderosa pine ecosystems, *Agricultural and Forest Meteorology*, 111, 203–222, [https://doi.org/10.1016/S0168-1923\(02\)00021-7](https://doi.org/10.1016/S0168-1923(02)00021-7), 2002.
- 35 Anthoni, P. M., Knohl, A., Rebmann, C., Freibauer, A., Mund, M., Ziegler, W., Kolle, O., and Schulze, E.-D.: Forest and agricultural land-use-dependent CO<sub>2</sub> exchange in Thuringia, Germany, *Global Change Biology*, 10, 2005–2019, <https://doi.org/10.1111/j.1365-2486.2004.00863.x>, 2004a.
- Anthoni, P. M., Freibauer, A., Kolle, O., and Schulze, E.-D.: Winter wheat carbon exchange in Thuringia, Germany, *Agricultural and Forest Meteorology*, 121, 55–67, [https://doi.org/10.1016/S0168-1923\(03\)00162-X](https://doi.org/10.1016/S0168-1923(03)00162-X), 2004b.
- 40 Ardö, J., Mölder, M., El-Tahir, B. A., and Elkhidir, H. A. M.: Seasonal variation of carbon fluxes in a sparse savanna in semi arid Sudan, *Carbon Balance Manage*, 3, 7, <https://doi.org/10.1186/1750-0680-3-7>, 2008.

- Arduini, I., Cardelli, R., and Bertacchi, A.: The forest of San Rossore (Tuscany, Italy): a call for its conservation through a multidisciplinary approach, <https://doi.org/10.5194/egusphere-egu2020-20738>, 2020.
- 45 Aubinet, M., Chermanne, B., Vandenhaute, M., Longdoz, B., Yernaux, M., and Laitat, E.: Long term carbon dioxide exchange above a mixed forest in the Belgian Ardennes, *Agricultural and Forest Meteorology*, 108, 293–315, [https://doi.org/10.1016/S0168-1923\(01\)00244-1](https://doi.org/10.1016/S0168-1923(01)00244-1), 2001.
- Aurela, M., Lohila, A., Tuovinen, J.-P., Hatakka, J., Penttilä, T., and Laurila, T.: Carbon dioxide and energy flux measurements in four northern-boreal ecosystems at Pallas, *Boreal Environ. Res.*, 20(4), 455–473, <http://hdl.handle.net/10138/228279>, 2015.
- 50 Baldocchi, D., Knox, S., Dronova, I., Verfaillie, J., Oikawa, P., Sturtevant, C., Matthes, J. H., and Detto, M.: The impact of expanding flooded land area on the annual evaporation of rice, *Agricultural and Forest Meteorology*, 223, 181–193, <https://doi.org/10.1016/j.agrformet.2016.04.001>, 2016.
- Baldocchi, D. D., Xu, L., and Kiang, N.: How plant functional-type, weather, seasonal drought, and soil physical properties alter water and energy fluxes of an oak–grass savanna and an annual grassland, *Agricultural and Forest Meteorology*, 123, 13–39, <https://doi.org/10.1016/j.agrformet.2003.11.006>, 2004.
- 55 Barron-Gafford, G. A., Scott, R. L., Jenerette, G. D., and Huxman, T. E.: The relative controls of temperature, soil moisture, and plant functional group on soil CO<sub>2</sub> efflux at diel, seasonal, and annual scales, *J. Geophys. Res.*, 116, G01023, <https://doi.org/10.1029/2010JG001442>, 2011.
- Beljaars, A. C. M. and Bosveld, F. C.: Cabauw Data for the Validation of Land Surface Parameterization Schemes, *J. Climate*, 10, 1172–1193, [https://doi.org/10.1175/1520-0442\(1997\)010<1172:CDFTVO>2.0.CO;2](https://doi.org/10.1175/1520-0442(1997)010<1172:CDFTVO>2.0.CO;2), 1997.
- 60 Berbigier, P., Bonnefond, J.-M., and Mellmann, P.: CO<sub>2</sub> and water vapour fluxes for 2 years above Euroflux forest site, *Agricultural and Forest Meteorology*, 108, 183–197, [https://doi.org/10.1016/S0168-1923\(01\)00240-4](https://doi.org/10.1016/S0168-1923(01)00240-4), 2001.
- Bergeron, O., Margolis, H. A., Black, T. A., Coursolle, C., Dunn, A. L., Barr, A. G., and Wofsy, S. C.: Comparison of carbon dioxide fluxes over three boreal black spruce forests in Canada, *Global Change Biol*, 13, 89–107, <https://doi.org/10.1111/j.1365-2486.2006.01281.x>, 2007.
- 65 Burns, S. P., Swenson, S. C., Wieder, W. R., Lawrence, D. M., Bonan, G. B., Knowles, J. F., and Blanken, P. D.: A Comparison of the Diel Cycle of Modeled and Measured Latent Heat Flux During the Warm Season in a Colorado Subalpine Forest, *J. Adv. Model. Earth Syst.*, 10, 617–651, <https://doi.org/10.1002/2017MS001248>, 2018.
- Byrne, K. A., Kiely, G., and Leahy, P.: CO<sub>2</sub> fluxes in adjacent new and permanent temperate grasslands, *Agricultural and Forest Meteorology*, 135, 82–92, <https://doi.org/10.1016/j.agrformet.2005.10.005>, 2005.
- 70 Carrara, A., Janssens, I. A., Curiel Yuste, J., and Ceulemans, R.: Seasonal changes in photosynthesis, respiration and NEE of a mixed temperate forest, *Agricultural and Forest Meteorology*, 126, 15–31, <https://doi.org/10.1016/j.agrformet.2004.05.002>, 2004.
- Chen, J. M., Govind, A., Sonnentag, O., Zhang, Y., Barr, A., and Amiro, B.: Anthoni, *Agricultural and Forest Meteorology*, 140, 257–268, <https://doi.org/10.1016/j.agrformet.2006.08.005>, 2006.
- 75 Chen, L. and Dirmeyer, P. A.: Adapting observationally based metrics of biogeophysical feedbacks from land cover/land

- use change to climate modeling, *Environ. Res. Lett.*, 11, 034002, <https://doi.org/10.1088/1748-9326/11/3/034002>, 2016.
- Chiesi, M., Maselli, F., Bindi, M., Fibbi, L., Cherubini, P., Arlotta, E., Tirone, G., Matteucci, G., and Seufert, G.: Modelling carbon budget of Mediterranean forests using ground and remote sensing measurements, *Agricultural and Forest Meteorology*, 135, 23-24, <https://doi.org/10.1016/j.agrformet.2005.09.011>, 2005.
- 80 Chu, H., Baldocchi, D. D., Poindexter, C., Abraha, M., Desai, A. R., Bohrer, G., Arain, M. A., Griffis, T., Blanken, P. D., O'Halloran, T. L., Thomas, R. Q., Zhang, Q., Burns, S. P., Frank, J. M., Christian, D., Brown, S., Black, T. A., Gough, C. M., Law, B. E., Lee, X., Chen, J., Reed, D. E., Massman, W. J., Clark, K., Hatfield, J., Prueger, J., Bracho, R., Baker, J. M., and Martin, T. A.: Temporal Dynamics of Aerodynamic Canopy Height Derived From Eddy Covariance Momentum Flux Data Across North American Flux Networks, *Geophys. Res. Lett.*, 45, 9275–9287, <https://doi.org/10.1029/2018GL079306>, 2018.
- Cook, B. D., Davis, K. J., Wang, W., Desai, A., Berger, B. W., Teclaw, R. M., Martin, J. G., Bolstad, P. V., Bakwin, P. S., Yi, C., and Heilman, W.: Carbon exchange and venting anomalies in an upland deciduous forest in northern Wisconsin, USA, *Agricultural and Forest Meteorology*, 126, 271–295, <https://doi.org/10.1016/j.agrformet.2004.06.008>, 2004.
- 90 Desai, A. R., Bolstad, P. V., Cook, B. D., Davis, K. J., and Carey, E. V.: Comparing net ecosystem exchange of carbon dioxide between an old-growth and mature forest in the upper Midwest, USA, *Agricultural and Forest Meteorology*, 128, 33–55, <https://doi.org/10.1016/j.agrformet.2004.09.005>, 2005.
- Desai, A. R., Noormets, A., Bolstad, P. V., Chen, J., Cook, B. D., Davis, K. J., Euskirchen, E. S., Gough, C., Martin, J. G., Ricciuto, D. M., Schmid, H. P., Tang, J., and Wang, W.: Influence of vegetation and seasonal forcing on carbon dioxide fluxes across the Upper Midwest, USA: Implications for regional scaling, *Agricultural and Forest Meteorology*, 148, 288–308, <https://doi.org/10.1016/j.agrformet.2007.08.001>, 2008.
- 95 Don, A., Rebmann, C., Kolle, O., Scherer-Lorenzen, M., and Schulze, E.-D.: Impact of afforestation-associated management changes on the carbon balance of grassland, *Global Change Biology*, 15, 1990–2002, <https://doi.org/10.1111/j.1365-2486.2009.01873.x>, 2009.
- 100 Dou, X. and Yang, Y.: Modeling Evapotranspiration Response to Climatic Forcings Using Data-Driven Techniques in Grassland Ecosystems, *Advances in Meteorology*, 2018, 1–18, <https://doi.org/10.1155/2018/1824317>, 2018.
- Dušek, J., Čížková, H., Czerný, R., Taufarová, K., Šmídová, M., and Janouš, D.: Influence of summer flood on the net ecosystem exchange of CO<sub>2</sub> in a temperate sedge-grass marsh, *Agricultural and Forest Meteorology*, 149, 1524–1530, <https://doi.org/10.1016/j.agrformet.2009.04.007>, 2009.
- 105 El-Madany, T. S., Reichstein, M., Perez-Priego, O., Carrara, A., Moreno, G., Pilar Martín, M., Pacheco-Labrador, J., Wohlfahrt, G., Nieto, H., Weber, U., Kolle, O., Luo, Y.-P., Carvalhais, N., and Migliavacca, M.: Drivers of spatio-temporal variability of carbon dioxide and energy fluxes in a Mediterranean savanna ecosystem, *Agricultural and Forest Meteorology*, 262, 258–278, <https://doi.org/10.1016/j.agrformet.2018.07.010>, 2018.
- Etzold, S., Ruehr, N. K., Zweifel, R., Dobbertin, M., Zingg, A., Pluess, P., Häslér, R., Eugster, W., and Buchmann, N.: The Carbon Balance of Two Contrasting Mountain Forest Ecosystems in Switzerland: Similar Annual Trends, but Seasonal Differences, *Ecosystems*, 14, 1289–1309, <https://doi.org/10.1007/s10021-011-9481-3>, 2011.
- 110 Ferréa, C., Zenone, T., Comolli, R., and Seufert, G.: Estimating heterotrophic and autotrophic soil respiration in a semi-natural forest of Lombardy, Italy, *Pedobiologia*, 55, 285–294, <https://doi.org/10.1016/j.pedobi.2012.05.001>, 2012.

- 115 Fischer, M. L., Billesbach, D. P., Berry, J. A., Riley, W. J., and Torn, M. S.: Spatiotemporal Variations in Growing Season Exchanges of CO<sub>2</sub>, H<sub>2</sub>O, and Sensible Heat in Agricultural Fields of the Southern Great Plains, *Earth Interactions*, 11, 1–21, <https://doi.org/10.1175/EI231.1>, 2007.
- Foken, T. (Ed.): *Energy and Matter Fluxes of a Spruce Forest Ecosystem*, Springer International Publishing, Cham, <https://doi.org/10.1007/978-3-319-49389-3>, 2017.
- 120 Gharun, M., Hörtnagl, L., Paul-Limoges, E., Ghiasi, S., Feigenwinter, I., Burri, S., Marquardt, K., Etzold, S., Zweifel, R., Eugster, W., and Buchmann, N.: Physiological response of Swiss ecosystems to 2018 drought across plant types and elevation, *Phil. Trans. R. Soc. B*, 375, 20190521, <https://doi.org/10.1098/rstb.2019.0521>, 2020.
- Giasson, M.-A., Coursolle, C., and Margolis, H. A.: Ecosystem-level CO<sub>2</sub> fluxes from a boreal cutover in eastern Canada before and after scarification, *Agricultural and Forest Meteorology*, 140, 23–40, <https://doi.org/10.1016/j.agrformet.2006.08.001>, 2006.
- 125 Gilmanov, T. G., Tieszen, L. L., Wylie, B. K., Flanagan, L. B., Frank, A. B., Haferkamp, M. R., Meyers, T. P., and Morgan, J. A.: Integration of CO<sub>2</sub> flux and remotely-sensed data for primary production and ecosystem respiration analyses in the Northern Great Plains: potential for quantitative spatial extrapolation: CO<sub>2</sub> flux in the Northern Great Plains, *Global Ecology and Biogeography*, 14, 271–292, <https://doi.org/10.1111/j.1466-822X.2005.00151.x>, 2005.
- 130 Gilmanov, T. G., Soussana, J. F., Aires, L., Allard, V., Ammann, C., Balzarolo, M., Barcza, Z., Bernhofer, C., Campbell, C. L., Cernusca, A., Cescatti, A., Clifton-Brown, J., Dirks, B. O. M., Dore, S., Eugster, W., Fuhrer, J., Gimeno, C., Gruenwald, T., Haszpra, L., Hensen, A., Ibrom, A., Jacobs, A. F. G., Jones, M. B., Lanigan, G., Laurila, T., Lohila, A., G. Manca, Marcolla, B., Nagy, Z., Pilegaard, K., Pinter, K., Pio, C., Raschi, A., Rogiers, N., Sanz, M. J., Stefani, P., Sutton, M., Tuba, Z., Valentini, R., Williams, M. L., and Wohlfahrt, G.: Partitioning European grassland net ecosystem CO<sub>2</sub> exchange into gross primary productivity and ecosystem respiration using light response function analysis, *Agriculture, Ecosystems & Environment*, 121, 93–120, <https://doi.org/10.1016/j.agee.2006.12.008>, 2007.
- 135 Granier, A., Biron, P., and Lemoine, D.: Water balance, transpiration and canopy conductance in two beech stands, *Agricultural and Forest Meteorology*, 100, 291–308, [https://doi.org/10.1016/S0168-1923\(99\)00151-3](https://doi.org/10.1016/S0168-1923(99)00151-3), 2000.
- Grant, R. F., Baldocchi, D. D., and Ma, S.: Ecological controls on net ecosystem productivity of a seasonally dry annual grassland under current and future climates: Modelling with ecosys, *Agricultural and Forest Meteorology*, 152, 189–200, <https://doi.org/10.1016/j.agrformet.2011.09.012>, 2012.
- 140 Gu, L., Meyers, T., Pallardy, S. G., Hanson, P. J., Yang, B., Heuer, M., Hosman, K. P., Riggs, J. S., Sluss, D., and Wullschleger, S. D.: Direct and indirect effects of atmospheric conditions and soil moisture on surface energy partitioning revealed by a prolonged drought at a temperate forest site, *J. Geophys. Res.*, 111, D16102, <https://doi.org/10.1029/2006JD007161>, 2006.
- 145 Harper, K. L., Lamarche, C., Hartley, A., Peylin, P., Ottlé, C., Bastrikov, V., San Martín, R., Bohnenstengel, S. I., Kirches, G., Boettcher, M., Shevchuk, R., Brockmann, C., and Defourny, P.: A 29-year time series of annual 300 m resolution plant-functional-type maps for climate models, *Earth Syst. Sci. Data*, 15, 1465–1499, <https://doi.org/10.5194/essd-15-1465-2023>, 2023.
- 150 Haughton, N., Abramowitz, G., Pitman, A. J., Or, D., Best, M. J., Johnson, H. R., Balsamo, G., Boone, A., Cuntz, M., Decharme, B., Dirmeyer, P. A., Dong, J., Ek, M., Guo, Z., Haverd, V., Pak, B., Jr, J. A. S., Stevens, L. E., and Vuichard, N.: The Plumbing of Land Surface Models: Is Poor Performance a Result of Methodology or Data Quality?, *Journal of*

- Hydrometeorology, 17, 1705-1723, <https://doi.org/10.1175/JHM-D-15-0171.1>, 2016.
- 155 Hollinger, D. Y., Goltz, S. M., Davidson, E. A., Lee, J. T., Tu, K., and Valentine, H. T.: Seasonal patterns and environmental control of carbon dioxide and water vapour exchange in an ecotonal boreal forest, *Global Change Biology*, 5, 891–902, <https://doi.org/10.1046/j.1365-2486.1999.00281.x>, 1999.
- 160 Hollinger, D. Y., Ollinger, S. V., Richardson, A. D., Meyers, T. P., Dail, D. B., Martin, M. E., Scott, N. A., Arkebauer, T. J., Baldocchi, D. D., Clark, K. L., Curtis, P. S., Davis, K. J., Desai, A. R., Dragoni, D., Goulden, M. L., Gu, L., Katul, G. G., Pallardy, S. G., Paw U, K. T., Schmid, H. P., Stoy, P. C., Suyker, A. E., and Verma, S. B.: Albedo estimates for land surface models and support for a new paradigm based on foliage nitrogen concentration, *Global Change Biology*, 16, 696–710, <https://doi.org/10.1111/j.1365-2486.2009.02028.x>, 2010.
- Hommeltenberg, J., Schmid, H. P., Drösler, M., and Werle, P.: Can a bog drained for forestry be a stronger carbon sink than a natural bog forest?, *Biogeosciences*, 11, 3477–3493, <https://doi.org/10.5194/bg-11-3477-2014>, 2014.
- 165 Hussain, M. Z., Grünwald, T., Tenhunen, J. D., Li, Y. L., Mirzae, H., Bernhofer, C., Otieno, D., Dinh, N. Q., Schmidt, M., Waringer, M., and Owen, K.: Summer drought influence on CO<sub>2</sub> and water fluxes of extensively managed grassland in Germany, *Agriculture, Ecosystems & Environment*, 141, 67–76, <https://doi.org/10.1016/j.agee.2011.02.013>, 2011.
- Hutley, L. B., O’Grady, A. P., and Eamus, D.: Evapotranspiration from Eucalypt open-forest savanna of Northern Australia: *Patterns of savanna evapotranspiration*, *Functional Ecology*, 14, 183–194, <https://doi.org/10.1046/j.1365-2435.2000.00416.x>, 2000.
- 170 Hutley, L. B., Beringer, J., Isaac, P. R., Hacker, J. M., and Cernusak, L. A.: A sub-continental scale living laboratory: Spatial patterns of savanna vegetation over a rainfall gradient in northern Australia, *Agricultural and Forest Meteorology*, 151, 1417–1428, <https://doi.org/10.1016/j.agrformet.2011.03.002>, 2011.
- Jacobs, C. M. J., Jacobs, A. F. G., Bosveld, F. C., Hendriks, D. M. D., Hensen, A., Kroon, P. S., Moors, E. J., Nol, L., Schrier-Uijl, A., and Veenendaal, E. M.: Variability of annual CO<sub>2</sub> exchange from Dutch grasslands, *Biogeosciences*, 4, 803–816, <https://doi.org/10.5194/bg-4-803-2007>, 2007.
- 175 Jaksic, V., Kiely, G., Albertson, J., Oren, R., Katul, G., Leahy, P., and Byrne, K. A.: Net ecosystem exchange of grassland in contrasting wet and dry years, *Agricultural and Forest Meteorology*, 139, 323–334, <https://doi.org/10.1016/j.agrformet.2006.07.009>, 2006.
- 180 Janssens, I.A., Meiresonne, L. and Ceulemans, R. (Eds.): Mean soil CO<sub>2</sub> efflux from a mixed forest: temporal and spatial integration, *Forest ecosystem modelling, upscaling and remote sensing*, SPB Academic Publishing, The Hague, The Netherlands, 1999.
- Káplová, M., Edwards, K. R., and Květ, J.: The effect of nutrient level on plant structure and production in a wet grassland: a field study, *Plant Ecol*, 212, 809–819, <https://doi.org/10.1007/s11258-010-9865-z>, 2011.
- 185 Kato, T., Tang, Y., Gu, S., Hirota, M., Du, M., Li, Y., and Zhao, X.: Temperature and biomass influences on interannual changes in CO<sub>2</sub> exchange in an alpine meadow on the Qinghai-Tibetan Plateau, *Global Change Biology*, 12, 1285–1298, <https://doi.org/10.1111/j.1365-2486.2006.01153.x>, 2006.
- Knohl, A., Schulze, E.-D., Kolle, O., and Buchmann, N.: Large carbon uptake by an unmanaged 250-year-old deciduous forest in Central Germany, *Agricultural and Forest Meteorology*, 118, 151–167, [14](https://doi.org/10.1016/S0168-</a></p></div><div data-bbox=)

1923(03)00115-1, 2003.

- 190 Kolari, P., Aalto, J., Levula, J., Kulmala, L., Ilvesniemi, H., & Pumpanen, J.: Hyytiälä SMEAR II site characteristics [Data set]. Zenodo. <https://doi.org/10.5281/zenodo.5909681>, 2022.
- Kowalska, N., Chojnicki, B. H., Rinne, J., Haapanala, S., Siedlecki, P., Urbaniak, M., Juszczak, R., and Olejnik, J.: Measurements of methane emission from a temperate wetland by the eddy covariance method, *International Agrophysics*, 27, 283–290, <https://doi.org/10.2478/v10247-012-0096-5>, 2013.
- 195 Krishnan, P., Meyers, T. P., Scott, R. L., Kennedy, L., and Heuer, M.: Energy exchange and evapotranspiration over two temperate semi-arid grasslands in North America, *Agricultural and Forest Meteorology*, 153, 31–44, <https://doi.org/10.1016/j.agrformet.2011.09.017>, 2012.
- Kurbatova, J., Li, C., Varlagin, A., Xiao, X., and Vygodskaya, N.: Modeling carbon dynamics in two adjacent spruce forests with different soil conditions in Russia, *Biogeosciences*, 5, 969–980, <https://doi.org/10.5194/bg-5-969-2008>, 2008.
- 200 Launiainen, S., Katul, G. G., Kolari, P., Lindroth, A., Lohila, A., Aurela, M., Varlagin, A., Grelle, A., and Vesala, T.: Do the energy fluxes and surface conductance of boreal coniferous forests in Europe scale with leaf area?, *Glob Change Biol*, 22, 4096–4113, <https://doi.org/10.1111/gcb.13497>, 2016.
- Law, B. E., Thornton, P. E., Irvine, J., Anthoni, P. M., and Van Tuyl, S.: Carbon storage and fluxes in ponderosa pine forests at different developmental stages, *Global Change Biology*, 7, 755–777, <https://doi.org/10.1046/j.1354-1013.2001.00439.x>, 2001.
- 205 Lawton, D., Leahy, P., Kiely, G., Byrne, K. A., and Calanca, P.: Modeling of net ecosystem exchange and its components for a humid grassland ecosystem, *J. Geophys. Res.*, 111, G04013, <https://doi.org/10.1029/2006JG000160>, 2006.
- Lehuger, S., Gabrielle, B., Cellier, P., Loubet, B., Roche, R., Béziat, P., Ceschia, E., and Wattenbach, M.: Predicting the net carbon exchanges of crop rotations in Europe with an agro-ecosystem model, *Agriculture, Ecosystems & Environment*, 139, 384–395, <https://doi.org/10.1016/j.agee.2010.06.011>, 2010.
- 210 Lin, W., Yuan, H., Dong, W., Zhang, S., Liu, S., Wei, N., Lu, X., Wei, Z., Hu, Y., and Dai, Y.: Reprocessed MODIS Version 6.1 Leaf Area Index Dataset and Its Evaluation for Land Surface and Climate Modeling, *Remote Sensing*, 15, 1780, <https://doi.org/10.3390/rs15071780>, 2023.
- Liu, Y., Hill, M. J., Zhang, X., Wang, Z., Richardson, A. D., Hufkens, K., Filippa, G., Baldocchi, D. D., Ma, S., Verfaillie, J., and Schaaf, C. B.: Using data from Landsat, MODIS, VIIRS and PhenoCams to monitor the phenology of California oak/grass savanna and open grassland across spatial scales, *Agricultural and Forest Meteorology*, 237–238, 311–325, <https://doi.org/10.1016/j.agrformet.2017.02.026>, 2017.
- Livesley, S. J., Grover, S., Hutley, L. B., Jamali, H., Butterbach-Bahl, K., Fest, B., Beringer, J., and Arndt, S. K.: Seasonal variation and fire effects on CH<sub>4</sub>, N<sub>2</sub>O and CO<sub>2</sub> exchange in savanna soils of northern Australia, *Agricultural and Forest Meteorology*, 151, 1440–1452, <https://doi.org/10.1016/j.agrformet.2011.02.001>, 2011.
- 220 Lopez-Sangil, L., Rousk, J., Wallander, H., and Casals, P.: Microbial growth rate measurements reveal that land-use abandonment promotes a fungal dominance of SOM decomposition in grazed Mediterranean ecosystems, *Biol Fertil Soils*, 47, 129–138, <https://doi.org/10.1007/s00374-010-0510-8>, 2011.

- 225 Loubet, B., Laville, P., Lehuger, S., Larmanou, E., Fléchar, C., Mascher, N., Genermont, S., Roche, R., Ferrara, R. M., Stella, P., Personne, E., Durand, B., Decuq, C., Flura, D., Masson, S., Fanucci, O., Rampon, J.-N., Siemens, J., Kindler, R., Gabrielle, B., Schrupf, M., and Cellier, P.: Carbon, nitrogen and Greenhouse gases budgets over a four years crop rotation in northern France, *Plant Soil*, 343, 109–137, <https://doi.org/10.1007/s11104-011-0751-9>, 2011.
- 230 Lund, M., Lafleur, P. M., Roulet, N. T., Lindroth, A., Christensen, T. R., Aurela, M., Chojnicki, B. H., Flanagan, L. B., Humphreys, E. R., Laurila, T., Oechel, W. C., Olejnik, J., Rinne, J., Schubert, P., and Nilsson, M. B.: Variability in exchange of CO<sub>2</sub> across 12 northern peatland and tundra sites, *Global Change Biology*, 16, 2436–2448, <https://doi.org/10.1111/j.1365-2486.2009.02104.x>, 2009.
- 235 Mäkelä, A., Pulkkinen, M., Kolari, P., Lagergren, F., Berbigier, P., Lindroth, A., Loustau, D., Nikinmaa, E., Vesala, T., and Hari, P.: Developing an empirical model of stand GPP with the LUE approach: analysis of eddy covariance data at five contrasting conifer sites in Europe, *Global Change Biology*, 14, 92–108, <https://doi.org/10.1111/j.1365-2486.2007.01463.x>, 2008.
- Marcolla, B., Pitacco, A., and Cescatti, A.: Canopy Architecture and Turbulence Structure in a Coniferous Forest, *Boundary-Layer Meteorology*, 108, 39–59, <https://doi.org/10.1023/A:1023027709805>, 2003.
- 240 Marcolla, B., Cescatti, A., and Manca, G.: Climatic controls and ecosystem responses drive the inter-annual variability of the net ecosystem exchange of an alpine meadow, *Agricultural and Forest Meteorology*, 151, 1233–1243, <https://doi.org/10.1016/j.agrformet.2011.04.015>, 2011.
- Marras, S., Pyles, R. D., Sirca, C., Paw U, K. T., Snyder, R. L., Duce, P., and Spano, D.: Evaluation of the Advanced Canopy–Atmosphere–Soil Algorithm (ACASA) model performance over Mediterranean maquis ecosystem, *Agricultural and Forest Meteorology*, 151, 730–745, <https://doi.org/10.1016/j.agrformet.2011.02.004>, 2011.
- 245 Matheny, A. M., Bohrer, G., Stoy, P. C., Baker, I. T., Black, A. T., Desai, A. R., Dietze, M. C., Gough, C. M., Ivanov, V. Y., Jassal, R. S., Novick, K. A., Schäfer, K. V. R., and Verbeeck, H.: Characterizing the diurnal patterns of errors in the prediction of evapotranspiration by several land-surface models: An NACP analysis: Error patterns in modeled transpiration, *J. Geophys. Res. Biogeosci.*, 119, 1458–1473, <https://doi.org/10.1002/2014JG002623>, 2014.
- 250 Meyer, W. S., Kondrlovà, E., and Koerber, G. R.: Evaporation of perennial semi-arid woodland in southeastern Australia is adapted for irregular but common dry periods: Evaporation from Mallee Woodland, *Hydrol. Process.*, 29, 3714–3726, <https://doi.org/10.1002/hyp.10467>, 2015.
- Meyers, T. and Hollinger, S. E.: An assessment of storage terms in the surface energy balance of maize and soybean, *Agricultural and Forest Meteorology*, 125, 105–115, <https://doi.org/10.1016/j.agrformet.2004.03.001>, 2004.
- 255 Miao, H., Chen, S., Chen, J., Zhang, W., Zhang, P., Wei, L., Han, X., and Lin, G.: Cultivation and grazing altered evapotranspiration and dynamics in Inner Mongolia steppes, *Agricultural and Forest Meteorology*, 149, 1810–1819, <https://doi.org/10.1016/j.agrformet.2009.06.011>, 2009.
- Migliavacca, M., Meroni, M., Manca, G., Matteucci, G., Montagnani, L., Grassi, G., Zenone, T., Teobaldelli, M., Goded, I., Colombo, R., and Seufert, G.: Seasonal and interannual patterns of carbon and water fluxes of a poplar plantation under peculiar eco-climatic conditions, *Agricultural and Forest Meteorology*, 149, 1460–1476, <https://doi.org/10.1016/j.agrformet.2009.04.003>, 2009.
- 260 Milyukova, I. M., Kolle, O., Varlagin, A. V., Vygodskaya, N. N., Schulze, E.-D., and Lloyd, J.: Carbon balance of a



- southern taiga spruce stand in European Russia, *Tellus B: Chemical and Physical Meteorology*, 54, 429, <https://doi.org/10.3402/tellusb.v54i5.16679>, 2002.
- 265 Monson, R. K., Turnipseed, A. A., Sparks, J. P., Harley, P. C., Scott-Denton, L. E., Sparks, K., and Huxman, T. E.: Carbon sequestration in a high-elevation, subalpine forest, *Global Change Biology*, 8, 459–478, <https://doi.org/10.1046/j.1365-2486.2002.00480.x>, 2002.
- Montagnani, L., Manca, G., Canepa, E., Georgieva, E., Acosta, M., Feigenwinter, C., Janous, D., Kerschbaumer, G., Lindroth, A., Minach, L., Minerbi, S., Mölder, M., Pavelka, M., Seufert, G., Zeri, M., and Ziegler, W.: A new mass conservation approach to the study of CO<sub>2</sub> advection in an alpine forest, *J. Geophys. Res.*, 114, D07306, <https://doi.org/10.1029/2008JD010650>, 2009.
- 270 Moors, E.: Water Use of Forests in The Netherlands, Ph.D. thesis, Vrije Universiteit Amsterdam, 2012.
- Moran, M. S., Scott, R. L., Keefer, T. O., Emmerich, W. E., Hernandez, M., Nearing, G. S., Paige, G. B., Cosh, M. H., and O'Neill, P. E.: Partitioning evapotranspiration in semiarid grassland and shrubland ecosystems using time series of soil surface temperature, *Agricultural and Forest Meteorology*, 149, 59–72, <https://doi.org/10.1016/j.agrformet.2008.07.004>, 2009.
- 275 Moreno, J. L., García, C., Landi, L., Falchini, L., Pietramellara, G., and Nannipieri, P.: The ecological dose value (ED50) for assessing Cd toxicity on ATP content and dehydrogenase and urease activities of soil, *Soil Biology and Biochemistry*, 33, 483–489, [https://doi.org/10.1016/S0038-0717\(00\)00189-9](https://doi.org/10.1016/S0038-0717(00)00189-9), 2001.
- Morillas, L., Bellucco, V., Lo Cascio, M., Marras, S., Spano, D., and Mereu, S.: Contribution of biological crust to soil CO<sub>2</sub> efflux in a Mediterranean shrubland ecosystem, *Geoderma*, 289, 11–19, <https://doi.org/10.1016/j.geoderma.2016.11.012>, 2017.
- 280 Moureaux, C., Debacq, A., Bodson, B., Heinesch, B., and Aubinet, M.: Annual net ecosystem carbon exchange by a sugar beet crop, *Agricultural and Forest Meteorology*, 139, 25–39, <https://doi.org/10.1016/j.agrformet.2006.05.009>, 2006.
- Nagy, Z., Czóbel, S., Balogh, J., Horváth, L., Fóti, S., Pintér, K., Weidinger, T., Csintalan, Z., and Tuba, Z.: Some preliminary results of the Hungarian grassland ecological research: Carbon cycling and greenhouse gas balances under changing, *Cereal Research Communications*, 33, 279–281, <https://doi.org/10.1556/CRC.33.2005.1.68>, 2005.
- 285 Neiryneck, J., Van Ranst, E., Roskams, P., and Lust, N.: Impact of decreasing throughfall depositions on soil solution chemistry at coniferous monitoring sites in northern Belgium, *Forest Ecology and Management*, 160, 127–142, [https://doi.org/10.1016/S0378-1127\(01\)00476-5](https://doi.org/10.1016/S0378-1127(01)00476-5), 2002.
- Nouvellon, Y., Moran, M. S., Seen, D. L., Bryant, R., Rambal, S., Ni, W., Bégué, A., Chehbouni, A., Emmerich, W. E., Heilman, P., and Qi, J.: Coupling a grassland ecosystem model with Landsat imagery for a 10-year simulation of carbon and water budgets, *Remote Sensing of Environment*, 78, 131–149, [https://doi.org/10.1016/S0034-4257\(01\)00255-3](https://doi.org/10.1016/S0034-4257(01)00255-3), 2001.
- 290 Oliphant, A. J. and Stoy, P. C.: An Evaluation of Semiempirical Models for Partitioning Photosynthetically Active Radiation Into Diffuse and Direct Beam Components, *JGR Biogeosciences*, 123, 889–901, <https://doi.org/10.1002/2017JG004370>, 2018.
- 295 Osterwalder, S., Eugster, W., Feigenwinter, I., and Jiskra, M.: Eddy covariance flux measurements of gaseous elemental

- mercury over a grassland, *Atmos. Meas. Tech.*, 13, 2057–2074, <https://doi.org/10.5194/amt-13-2057-2020>, 2020.
- Pereira, J. S., Mateus, J. A., Aires, L. M., Pita, G., Pio, C., David, J. S., Andrade, V., Banza, J., David, T. S., Paço, T. A., and Rodrigues, A.: Net ecosystem carbon exchange in three contrasting Mediterranean ecosystems – the effect of drought, *Biogeosciences*, 4, 791–802, <https://doi.org/10.5194/bg-4-791-2007>, 2007.
- Pilegaard, K., Mikkelsen, T. N., Beier, C., Jensen, N. O., Ambus, P., and Ro-Poulsen, H.: Field measurements of atmosphere– biosphere interactions in a Danish beech forest, *Boreal Env. Res.* 8: 315–333. ISSN 1239-6095, 2003.
- Powell, T. L., Bracho, R., Li, J., Dore, S., Hinkle, C. R., and Drake, B. G.: Environmental controls over net ecosystem carbon exchange of scrub oak in central Florida, *Agricultural and Forest Meteorology*, 141, 19–34, <https://doi.org/10.1016/j.agrformet.2006.09.002>, 2006.
- Prescher, A.-K., Grünwald, T., and Bernhofer, C.: Land use regulates carbon budgets in eastern Germany: From NEE to NBP, *Agricultural and Forest Meteorology*, 150, 1016–1025, <https://doi.org/10.1016/j.agrformet.2010.03.008>, 2010.
- Rambal, S., Ourcival, J.-M., Joffre, R., Mouillot, F., Nouvellon, Y., Reichstein, M., and Rocheteau, A.: Drought controls over conductance and assimilation of a Mediterranean evergreen ecosystem: scaling from leaf to canopy, *Global Change Biology*, 9, 1813–1824, <https://doi.org/10.1111/j.1365-2486.2003.00687.x>, 2003.
- Raz-Yaseef, N., Billesbach, D. P., Fischer, M. L., Biraud, S. C., Gunter, S. A., Bradford, J. A., and Torn, M. S.: Vulnerability of crops and native grasses to summer drying in the U.S. Southern Great Plains, *Agriculture, Ecosystems & Environment*, 213, 209–218, <https://doi.org/10.1016/j.agee.2015.07.021>, 2015.
- Reichstein, M., Tenhunen, J. D., Roupsard, O., Ourcival, J.-M., Rambal, S., Dore, S., and Valentini, R.: Ecosystem respiration in two Mediterranean evergreen Holm Oak forests: drought effects and decomposition dynamics: *Analysis of ecosystem respiration*, *Functional Ecology*, 16, 27–39, <https://doi.org/10.1046/j.0269-8463.2001.00597.x>, 2002.
- Rey, A., Pegoraro, E., Tedeschi, V., De Parri, I., Jarvis, P. G., and Valentini, R.: Annual variation in soil respiration and its components in a coppice oak forest in Central Italy, *Global Change Biology*, 8, 851–866, <https://doi.org/10.1046/j.1365-2486.2002.00521.x>, 2002.
- Rivalland, V., Calvet, J.-Ch., Berbigier, P., Brunet, Y., and Granier, A.: Transpiration and CO<sub>2</sub> fluxes of a pine forest: modelling the undergrowth effect, *Ann. Geophys.*, 23, 291–304, <https://doi.org/10.5194/angeo-23-291-2005>, 2005.
- Rogger, J., Hörtnagl, L., Buchmann, N., and Eugster, W.: Carbon dioxide fluxes of a mountain grassland: Drivers, anomalies and annual budgets, *Agricultural and Forest Meteorology*, 314, 108801, <https://doi.org/10.1016/j.agrformet.2021.108801>, 2022.
- Ruehr, N. K., Law, B. E., Quandt, D., and Williams, M.: Effects of heat and drought on carbon and water dynamics in a regenerating semi-arid pine forest: a combined experimental and modeling approach, *Biogeosciences*, 11, 4139–4156, <https://doi.org/10.5194/bg-11-4139-2014>, 2014.
- Sabbatini, S., Arriga, N., Bertolini, T., Castaldi, S., Chiti, T., Consalvo, C., Njakou Djomo, S., Gioli, B., Matteucci, G., and Papale, D.: Greenhouse gas balance of cropland conversion to bioenergy poplar short-rotation coppice, *Biogeosciences*, 13, 95–113, <https://doi.org/10.5194/bg-13-95-2016>, 2016.
- Schmid, H. P., Grimmond, C. S. B., Cropley, F., Offerle, B., & Su, H. B., H.: Measurements of CO<sub>2</sub> and energy fluxes

- over a mixed hardwood forest in the mid-western United States, *Agricultural and Forest Meteorology*, 103, 357–374, [https://doi.org/10.1016/S0168-1923\(00\)00140-4](https://doi.org/10.1016/S0168-1923(00)00140-4), 2000.
- 335 Schmid, S., Zierl, B., and Bugmann, H.: Analyzing the carbon dynamics of central European forests: comparison of Biome-BGC simulations with measurements, *Reg Environ Change*, 6, 167–180, <https://doi.org/10.1007/s10113-006-0017-x>, 2006.
- Schmidt, M., Reichenau, T. G., Fiener, P., and Schneider, K.: The carbon budget of a winter wheat field: An eddy covariance analysis of seasonal and inter-annual variability, *Agricultural and Forest Meteorology*, 165, 114–126, <https://doi.org/10.1016/j.agrformet.2012.05.012>, 2012.
- 340 Schulze, E. -D., Lloyd, J., Kelliher, F. M., Wirth, C., Rebmann, C., Lühker, B., Mund, M., Knohl, A., Milyukova, I. M., Schulze, W., Ziegler, W., Varlagin, A. β., Sogachev, A. F., Valentini, R., Dore, S., Grigoriev, S., Kolle, O., Panfyorov, M. I., Tchebakova, N., and Vygodskaya, Nn.: Productivity of forests in the Eurosiberian boreal region and their potential to act as a carbon sink -- a synthesis, *Global Change Biology*, 5, 703–722, <https://doi.org/10.1046/j.1365-2486.1999.00266.x>, 1999.
- 345 Scott, R. L., Huxman, T. E., Cable, W. L., and Emmerich, W. E.: Partitioning of evapotranspiration and its relation to carbon dioxide exchange in a Chihuahuan Desert shrubland, *Hydrol. Process.*, 20, 3227–3243, <https://doi.org/10.1002/hyp.6329>, 2006.
- 350 Scott, R. L., Jenerette, G. D., Potts, D. L., and Huxman, T. E.: Effects of seasonal drought on net carbon dioxide exchange from a woody-plant-encroached semiarid grassland, *J. Geophys. Res.*, 114, G04004, <https://doi.org/10.1029/2008JG000900>, 2009.
- Scott, R. L., Hamerlynck, E. P., Jenerette, G. D., Moran, M. S., and Barron-Gafford, G. A.: Carbon dioxide exchange in a semidesert grassland through drought-induced vegetation change, *J. Geophys. Res.*, 115, G03026, <https://doi.org/10.1029/2010JG001348>, 2010.
- 355 Scott, R. L., Biederman, J. A., Hamerlynck, E. P., and Barron-Gafford, G. A.: The carbon balance pivot point of southwestern U.S. semiarid ecosystems: Insights from the 21st century drought, *J. Geophys. Res. Biogeosci.*, 120, 2612–2624, <https://doi.org/10.1002/2015JG003181>, 2015.
- Shangguan, W., Dai, Y., Duan, Q., Liu, B., and Yuan, H.: A global soil data set for earth system modeling, *J. Adv. Model. Earth Syst.*, 6, 249–263, <https://doi.org/10.1002/2013MS000293>, 2014.
- 360 Slevin, D., Tett, S. F. B., and Williams, M.: Multi-site evaluation of the JULES land surface model using global and local data, *Geosci. Model Dev.*, 8, 295–316, <https://doi.org/10.5194/gmd-8-295-2015>, 2015.
- 365 Soussana, J. F., Allard, V., Pilegaard, K., Ambus, P., Amman, C., Campbell, C., Ceschia, E., Clifton-Brown, J., Czobel, S., Domingues, R., Flechard, C., Fuhrer, J., Hensen, A., Horvath, L., Jones, M., Kasper, G., Martin, C., Nagy, Z., Neftel, A., Raschi, A., Baronti, S., Rees, R. M., Skiba, U., Stefani, P., Manca, G., Sutton, M., Tuba, Z., and Valentini, R.: Full accounting of the greenhouse gas (CO<sub>2</sub>, N<sub>2</sub>O, CH<sub>4</sub>) budget of nine European grassland sites, *Agriculture, Ecosystems & Environment*, 121, 121–134, <https://doi.org/10.1016/j.agee.2006.12.022>, 2007.
- Sun, Q., Meyer, W. S., Koerber, G. R., and Marschner, P.: Prior rainfall pattern determines response of net ecosystem carbon exchange to a large rainfall event in a semi-arid woodland, *Agriculture, Ecosystems & Environment*, 247, 112–119, <https://doi.org/10.1016/j.agee.2017.06.032>, 2017.

- 370 Tang, J., Bolstad, P. V., Ewers, B. E., Desai, A. R., Davis, K. J., and Carey, E. V.: Sap flux-upscaled canopy transpiration, stomatal conductance, and water use efficiency in an old growth forest in the Great Lakes region of the United States, *J. Geophys. Res.*, 111, G02009, <https://doi.org/10.1029/2005JG000083>, 2006.
- Tedeschi, V., Rey, A., Manca, G., Valentini, R., Jarvis, P. G., and Borghetti, M.: Soil respiration in a Mediterranean oak forest at different developmental stages after coppicing, *Global Change Biology*, 12, 110–121, <https://doi.org/10.1111/j.1365-2486.2005.01081.x>, 2006.
- 375 Thomas, C. K., Law, B. E., Irvine, J., Martin, J. G., Pettijohn, J. C., and Davis, K. J.: Seasonal hydrology explains interannual and seasonal variation in carbon and water exchange in a semiarid mature ponderosa pine forest in central Oregon, *J. Geophys. Res.*, 114, G04006, <https://doi.org/10.1029/2009JG001010>, 2009.
- Thum, T., Aalto, T., Laurila, T., Aurela, M., Kolari, P., and Hari, P.: Parametrization of two photosynthesis models at the canopy scale in a northern boreal Scots pine forest, *Tellus B: Chemical and Physical Meteorology*, 59, 847, <https://doi.org/10.1111/j.1600-0889.2007.00305.x>, 2007.
- 380 Ukkola, A. M., Abramowitz, G., and De Kauwe, M. G.: A flux tower dataset tailored for land model evaluation, *Earth Syst. Sci. Data*, 14, 449–461, <https://doi.org/10.5194/essd-14-449-2022>, 2022.
- Verma, S. B., Dobermann, A., Cassman, K. G., Walters, D. T., Knops, J. M., Arkebauer, T. J., Suyker, A. E., Burba, G. G., Amos, B., Yang, H., Ginting, D., Hubbard, K. G., Gitelson, A. A., and Walter-Shea, E. A.: Annual carbon dioxide exchange in irrigated and rainfed maize-based agroecosystems, *Agricultural and Forest Meteorology*, 131, 77–96, <https://doi.org/10.1016/j.agrformet.2005.05.003>, 2005.
- 385 Vesala, T., Suni, T., Rannik, Ü., Keronen, P., Markkanen, T., Sevanto, S., Grönholm, T., Smolander, S., Kulmala, M., Ilvesniemi, H., Ojansuu, R., Uotila, A., Levula, J., Mäkelä, A., Pumpanen, J., Kolari, P., Kulmala, L., Altimir, N., Berninger, F., Nikinmaa, E., and Hari, P.: Effect of thinning on surface fluxes in a boreal forest, *Global Biogeochem. Cycles*, 19, GB2001, <https://doi.org/10.1029/2004GB002316>, 2005.
- 390 Vitale, L., Di Tommasi, P., D’Urso, G., and Magliulo, V.: The response of ecosystem carbon fluxes to LAI and environmental drivers in a maize crop grown in two contrasting seasons, *Int J Biometeorol*, 60, 411–420, <https://doi.org/10.1007/s00484-015-1038-2>, 2016.
- Whitley, R., Beringer, J., Hutley, L. B., Abramowitz, G., De Kauwe, M. G., Duursma, R., Evans, B., Haverd, V., Li, L., 395 Ryu, Y., Smith, B., Wang, Y.-P., Williams, M., and Yu, Q.: A model inter-comparison study to examine limiting factors in modelling Australian tropical savannas, *Biogeosciences*, 13, 3245–3265, <https://doi.org/10.5194/bg-13-3245-2016>, 2016.
- van Wijk, M. T. and Bouten, W.: Analyzing latent heat fluxes of coniferous forests with fuzzy logic, *Water Resour. Res.*, 36, 1865–1872, <https://doi.org/10.1029/2000WR900068>, 2000.
- 400 Wohlfahrt, G., Hammerle, A., Haslwanter, A., Bahn, M., Tappeiner, U., and Cernusca, A.: Seasonal and inter-annual variability of the net ecosystem CO<sub>2</sub> exchange of a temperate mountain grassland: Effects of weather and management, *J. Geophys. Res.*, 113, D08110, <https://doi.org/10.1029/2007JD009286>, 2008.
- Zweifel, R., Eugster, W., Etzold, S., Dobbertin, M., Buchmann, N., and Häsler, R.: Link between continuous stem radius changes and net ecosystem productivity of a subalpine Norway spruce forest in the Swiss Alps, *New Phytologist*, 187, 405 819–830, <https://doi.org/10.1111/j.1469-8137.2010.03301.x>, 2010.
